1 **RESEARCH ARTICLE**

2 **TITLE:** H<sup>+</sup>/K<sup>+</sup> ion pump enhances cytoskeletal polarity to drive gastrulation in sea  
3 urchin embryo

4 **Running title:** H<sup>+</sup>/K<sup>+</sup> ion pump and gastrulation

5 Kaichi Watanabe<sup>1,\*</sup>, Yuhei Yasui<sup>1</sup>, Yuta Kurose<sup>2</sup>, Masashi Fujii<sup>1</sup>, Takashi Yamamoto<sup>1</sup>,  
6 Naoaki Sakamoto<sup>1,\*</sup>, Akinori Awazu<sup>1,3,\*</sup>

7

8 <sup>1</sup> Graduate School of Integrated Sciences for Life, Hiroshima University, Higashi-  
9 Hiroshima, 739-8526, Japan

10 <sup>2</sup> Department of Mathematical and Life Sciences, Graduate School of Science,  
11 Hiroshima University, Higashi-Hiroshima, 739-8526, Japan

12 <sup>3</sup> Research Center for the Mathematics on Chromatin Live Dynamics, Hiroshima  
13 University, Higashi-Hiroshima, Hiroshima, 739-8526, Japan

14

15 \*Corresponding authors (kaichi1849@hiroshima-u.ac.jp (K.W.); naosaka@hiroshima-  
16 u.ac.jp (N. S.); awa@hiroshima-u.ac.jp (A. A.))

17

18 **KEY WORDS:** Gastrulation, H<sup>+</sup>/K<sup>+</sup> ion pump, sea urchin, cytoskeleton, pH  
19 regulation

20 **Summary statement:** The H<sup>+</sup>/K<sup>+</sup> ion pump is critical for normal gastrulation in  
21 sea urchin through pH regulation of cell-position dependent intracellular actin  
22 distributions.

23 **ABSTRACT**

24 Gastrulation is a universal process in the morphogenesis of many animal embryos. In  
25 sea urchin embryos, it involves the invagination of single-layered vegetal plate  
26 into blastocoel. Although morphological and molecular events have been well  
27 studied for gastrulation, the mechanical driving forces and their regulatory  
28 mechanism underlying the gastrulation is not fully understood. In this study,  
29 structural features and cytoskeletal distributions were studied in sea urchin embryo  
30 using an “exogastrulation” model induced by inhibiting the  $H^+/K^+$  ion pump with  
31 omeprazole. The vegetal pole sides of the exogastrulating embryos had reduced  
32 roundness indices, intracellular pH polarization, and intracellular F-actin polarization at  
33 the pre-early gastrulation compared with the normal embryo. Gastrulation stopped when  
34 F-actin polymerization or degradation was inhibited by *RhoA* or *YAPI* knockout,  
35 although pH distributions were independent of such a knockout. A mathematical model  
36 of sea urchin embryos at the early gastrulation reproduced the shapes of both normal  
37 and exogastrulating embryos using cell-dependent cytoskeletal features based on F-actin  
38 and pH distributions. Thus, gastrulation required appropriate cell position-dependent  
39 intracellular F-actin distributions regulated by the  $H^+/K^+$  ion pump through pH control.  
40

## 41 INTRODUCTION

42 Gastrulation is a universal and essential morphogenic process in various animals,  
43 wherein a ball of single layered cells (blastula) differentiates into a multilayered  
44 gastrula or early embryo (Serrano Nájera and Weijer, 2020; Shindo, 2018; Stower and  
45 Bertocchini, 2017). Species-specific variations in this process provides the basis for  
46 particular animal morphologies and leads to the generation of internal organs. The basic  
47 mechanism of whole embryonic transformations induced by organizational  
48 rearrangements and cell movements are expected to be universal.

49 Sea urchin embryos are commonly used for studying various morphogenetic  
50 processes universally observed in animals, such as the left–right symmetry breakage  
51 (Aihara and Amemia, 2001; McCain and McClay, 1994; Takemoto et al., 2016; Warner  
52 and McClay, 2014), neural network formations (Burke et al., 2014; McClay et al., 2018;  
53 Yaguchi et al., 2010), and gastrulation (Dan and Okazaki, 1956; Gustafson and  
54 Kinnander, 1960; Hardin and Cheng, 1986; Kominami and Takata, 2004; Martik and  
55 McClay, 2017) due to its evolutionary position as an ancestral deuterostome.  
56 Furthermore, the gene regulatory network controlling endomesoderm specification in  
57 sea urchin embryo has been well studied (Davidson et al., 2002; Oliveri & Davidson,  
58 2004). Sea urchin gastrulation progresses through the following four steps (Kominami  
59 and Takata, 2004): step 1 (after hatching), the embryo becomes an epithelial monolayer  
60 with a thickened vegetal pole; step 2 (pre-gastrulation), the vegetal plate bends to  
61 invade the blastocoel; step 3 (early gastrulation), the tubular archenteron is formed, and  
62 secondary mesenchyme cells (SMCs) appear at the tip; step 4 (mid-late gastrulation),

63 the archenteron elongates by pulling on the filopodia of the SMC. Steps 1 and 2 refer to  
64 the primary invagination stages, and steps 3 and 4 are those of the secondary  
65 invagination stages (Dan and Okazaki, 1956; Gustafson and Kinnander, 1956).

66 The embryos of some sea urchin species exhibit anomalous morphogenesis  
67 (exogastrulation) under various perturbations where the vegetal plate of the embryo  
68 prolapses outward instead of invaginating. For example, the archenteron of embryos  
69 cultured with LiCl or sugar is completely evaginated due to the depolymerization of  
70 SMC microtubules in the blastocoel space connecting the primary intestine and  
71 ectoderm (Dan and Okazaki, 1956; Hardin and Cheng, 1986; Khurram et al., 2004).  
72 These studies suggest that lifting the primary intestine from the mid-gut by  
73 microtubules plays an important role in step 4 of gastrulation. Exogastrulation was also  
74 observed by Rab35 knockdown that was also suggested to disturb whole embryonic  
75 cytoskeleton distribution (Remsburg et al., 2021).

76 Moreover, bending of the vegetal plate in step 2 of normally cultured embryos of  
77 the sea urchin, *Lytechinus pictus* (LP), occurs even when it is surgically isolated  
78 (Ettensohn, 1984). It is suggested that the tip of the archenteron should be bottle-shaped  
79 (Nakajima and Burke, 1996), and the area around the vegetal plate should be wedge-  
80 shaped (Burke et al., 1991) to initiate primary invagination (Kominami and Takata,  
81 2004). Additionally, mathematical models of vegetal poles suggest that primary  
82 invagination occurs under the appropriate force conditions for “apical constriction,”  
83 “cell tractor,” “apical contractile ring,” “apicobasal contraction,” and “gel swelling”  
84 (Davidson et al., 1995; Odell et al., 1981). However, it is unclear which of these effects

85 are essential for development up to pre-early gastrulation (steps 2 and 3).

86 In this study, the roles of the dominant factors in steps 2 and 3 of gastrulation of sea  
87 urchins were determined through experimental analyses and mathematical modeling.  
88 First, specific inhibition of  $H^+/K^+$  ion pump activity by omeprazole caused “partial”  
89 exogastrulation without the loss of microtubules in the blastocoel space of embryos  
90 from the sea urchin, *Hemicentrotus pulcherrimus* (HP). The  $H^+/K^+$  ion pump regulates  
91 the pH in cells and pH influences the structure and force of the actomyosin system  
92 (Köhler et al., 2012). Therefore, the partial exogastrulation was likely due to anomalous  
93 cytoskeletal behaviors. Second, knockout experiments on cytoskeleton-related  
94 molecules were performed in HP embryos and analyzed by fluorescence imaging. Third,  
95 simulations of morphogenic process of normal and  $H^+/K^+$  ion pump inhibited  
96 (exhibiting exogastrulation) HP embryo during the pre-early gastrulation were  
97 performed using a mathematical model utilizing the cytoskeletal force parameters  
98 determined by the above experiments. The modeled shapes of the  $H^+/K^+$  ion pump-  
99 inhibited embryos of the sea urchin, *Lytechinus variegatus* (LV,) were compared to  
100 those of HP to reveal the contributions of the  $H^+/K^+$  ion pump to the regulation of  
101 cytoskeletal behaviors.

102

## 103 **RESULTS**

### 104 **$H^+/K^+$ ion pump inhibition in HP embryos caused partial exogastrulation**

105 The development of HP embryos exposed to the specific  $H^+/K^+$  ion pump inhibitor,  
106 omeprazole, immediately after fertilization exhibited anomalous morphogenesis with

107 partial exogastrulation observed at the primary-secondary invagination stages and 36  
108 hours post fertilization (hpf) (Fig. 1). Detailed comparisons of the structural features  
109 around the vegetal pole between the normal (control) and inhibited embryos at each  
110 gastrulation step are as follows. In step 1, control and inhibited embryos exhibited  
111 equivalent vegetal pole thickening (18-20 hpf). In step 2, primary invagination occurred  
112 in both control and inhibited embryos at the same time. However, intestinal invagination  
113 was slightly shallower in the inhibited embryos than in the control embryos (20-22 hpf).  
114 In step 3, inhibited embryos did not show further elongation of the archenteron into the  
115 blastocoel, and the shape of inhibited embryos elongated along the animal-vegetal axis  
116 (22-24 hpf). In step 4 (secondary invagination stage), the outward protrusion of the  
117 vegetal pole side was more pronounced in the inhibited embryo (24 hpf). The inhibited  
118 embryo had comparatively little elongation of the archenteron into the blastocoel  
119 compared to the control embryos. At 36 hpf, “partial” exogastrulation, in which the tip  
120 of archenteron folded inward by the normal primary invagination but the remaining part  
121 extended outward during the secondary invagination, was observed in the inhibited  
122 embryo.

123 The migration of SMCs was observed in the control embryos and in the inhibited  
124 embryos (Fig. 2) indicating that filopodia were formed. Previously reported  
125 exogastrulation was induced by the loss of pseudopodia (Dan and Okazaki, 1956;  
126 Hoshi, 1979; Khurram et al., 2004), therefore, partial exogastrulation in this report was  
127 expected to occur by a different mechanism.

128

129 **H<sup>+</sup>/K<sup>+</sup> ion pump inhibition perturbed whole embryonic pH and cytoskeletal**

130 **distributions**

131 The intracellular distribution of F-actin and pH was analyzed at the primary  
132 invagination stage (steps 1 and 2) to reveal the mechanism underlying the  
133 morphological changes in the inhibited embryos at the secondary invagination stage  
134 (steps 3 and 4), (Fig. 3A, B). F-actin was visualized by fluorescence of actinin-GFP, and  
135 intracellular pH was estimated with pH indicator, whose fluorescent intensity increased  
136 as pH decreased. The polarity of intracellular F-actin and pH distribution was evaluated  
137 by estimating the fluorescence intensities ratio between the apical and basal sides of  
138 cells.

139 Similar apical/basal ratio distributions of actinin-GFP intensities were obtained between  
140 the control and inhibited embryos, while the ratios gradually increased closer to the  
141 vegetal pole in both embryos at step 1 (Fig. 3C, D, Fig. S1A, B). The distribution of the  
142 apical/basal ratios of actinin-GFP intensities in step 2 were similar between control and  
143 inhibited embryos only in the animal half (Fig. 3E, Fig. S1C). The ratios of the control  
144 embryos from the equator to the vegetal pole was larger than that of inhibited embryos,  
145 while nearest the vegetal pole, control embryos showed smaller ratio than that of  
146 inhibited embryos. Therefore, the formation of an anomalous embryonic shape of  
147 inhibited embryos correlated with the deviation of intracellular F-actin polarity in the  
148 vegetal half of the embryos in primary invagination.

149 The apical/basal ratio of the pH indicator was greater than one in both control and  
150 inhibited embryos in step 2 (Fig. 3F, Fig. S1D, S2) indicating that the pH on the apical

151 side of each cell was always lower than that on the basal side. Additionally, this ratio  
152 was higher in the vegetal half than that in the animal half in the control embryo, while  
153 this pattern disappeared in the inhibited embryo (Fig. 3F, Fig. S2). Thus, the polarity of  
154 the pH indicator fluorescent intensities was positively correlated with that of actinin-  
155 GFP in whole embryos (Fig. 3E, F).

156 Meanwhile, inhibition of the H<sup>+</sup>/K<sup>+</sup> ion pump did not influence the whole  
157 embryonic distribution of fibropellin-1 (Fig. 3G, H), a F-actin scaffold in the apical  
158 lamina of the apical pole (Burke et al., 1998; Nakajima and Burke, 1996).

159

## 160 **Gastrulation starts but does not progress in embryos with knocked out**

### 161 **cytoskeleton regulators**

162 CRISPR-Cas9-mediated knockout of the typical enhancer and repressor of F-actin  
163 formation (*RhoA* and *YAPI*) (Beane et al., 2006; Dupont et al., 2011) was performed by  
164 microinjection of sgRNAs designed with *Cas9* mRNA (Fig. S3) to elucidate the  
165 contribution of F-actin to the gastrulation process. Although the mutation frequencies of  
166 *RhoA* and *YAPI* knockout were 55.6% and 77.8%, respectively, and the frameshift rate  
167 was 22.3% in either knockout (Fig. S3), the gastrulation stopped at step 2 at the primary  
168 invagination stage in either *RhoA* or *YAPI* knockout embryos (Fig. 4A) and normal  
169 gastrulation and exogastrulation were not observed. Interestingly, the phenotypes  
170 between these gene knockout embryos were similar, although the gene functions are  
171 different (Fig. S3). Pigmented cells were observed at 45 hpf indicating that development  
172 had not ceased. This showed that primary invagination occurred even in embryos with



173 mild perturbation of F-actin function, but subsequent gastrulation processes required  
174 appropriate F-actin-derived forces.

175 The whole embryonic distribution of average intensity and apical/basal ratios of the  
176 pH indicator was unchanged in *RhoA*-knockout embryos compared with the control, and  
177 therefore, perturbation of F-actin polymerization did not affect the pH gradient of the  
178 cell (Fig. 4B, C).

179

## 180 **Mathematical model of embryonic shape formations in early gastrulation** 181 **considering cell-dependent F-actin polarity**

182 A mathematical model of cell motion at the cross section including animal and vegetal  
183 poles during steps 1-3 of gastrulation was constructed to examine the influence of  
184 intracellular F-actin distribution on the formation of embryonic shapes. The model was  
185 constructed based on that of gastrulation in *Nematostella vectensis* (Tamulonis et al.,  
186 2011) that consisted of cells constructed by springs and beads circularly connected to  
187 form a 2-dimensional cross section of the embryo. The following assumptions were  
188 made based on experimentally known facts.

189 I) Each embryo contained three cell types: pigment cells (Takata and Kominami, 2004),  
190 wedge cells (Burke et al., 1991), and other cells (Fig. 5). The pigment cells near the  
191 entrance to the cavity were assumed to be bottle-shaped (Takata and Kominami, 2004)  
192 because of the site-specific force in these cells. This may explain the bending of the  
193 vegetal plate occurring in embryos with knocked out F-actin polymerization regulators  
194 (Fig. 4), or a surgically removed animal pole (Ettensohn, 1984). The apical length was

195 sufficiently shorter than the basal length and the apical sides of wedge cells were wider  
196 than the basal side (Fig. 5A) to form a similar shape to previously observed embryos  
197 (Kominami and Takata, 2004).

198 II) The width of the apical and basal sides changes in a cell-dependent manner in  
199 control and inhibited embryos due to cytoskeletal forces generated by F-actin. The  
200 apical side elongation was expected to correlate with F-actin concentration because  
201 higher F-actin concentration was expected to generate stronger cell cortical forces.  
202 Thus, the lengths of the apical and basal sides of cells, except pigment cells and wedge  
203 cells, were determined based on their apical/basal ratios of actinin-GFP intensities at  
204 step 2 (Fig. 5A).

205 III) The cell divisions and 3-dimensional mutual cell invasions mainly contributing to  
206 late gastrulation were not included because these processes were rarely observed in  
207 early gastrulation (Mizoguchi, 1999). Therefore, the present model described embryo  
208 shape dynamics of the control and inhibited embryos as 2-dimensional motions and  
209 deformations of the apical and basal sides of 64 cells (Fig. 5A).

210 The simulations showed different shapes (Fig. 5B), although each shape was like  
211 that experimentally observed at step 3 (Fig. 1). Similar temporal changes in roundness  
212 indices (Fig. 5C) of control embryos (0.85 ~ 0.9) and inhibited embryos (0.75 ~ 0.8)  
213 were observed in the simulated data (Fig. 5D, Fig. S4A) and experimental data (Fig. 5E,  
214 Fig. S4B).

215 The simulation where the elongation ratio of the apical side of each cell was a little  
216 larger than that of control was also performed, with this model named: “over-polarized

217 embryo” (Fig. 5A, B). The whole embryonic shape of this model resulted in a wider and  
218 larger roundness index than the control embryos (Fig. S4A). This suggested that the  
219 apical/basal ratio polarity of F-actin distribution in each cell was sensitive to the whole  
220 embryonic shape.

221

## 222 **DISCUSSION**

223 Inhibition of the H<sup>+</sup>/K<sup>+</sup> ion pump resulted in abnormal embryo shape with partial  
224 exogastrulation due to intracellular apical F-actin distribution at the vegetal pole (Fig. 3,  
225 5). F-actin concentrations generating cell cortical forces were significantly larger at the  
226 apical side of each cell than that of the basal side in the vegetal half of the control  
227 embryos, except for cells at the vegetal pole. Therefore, the apical planes of wedge cells  
228 and other cells in the vegetal pole side were expected to be significantly wider than the  
229 basal planes. Conversely, the apical plane of cells in the vegetal half of the inhibited  
230 embryo were not significantly wider compared to the basal sides due to lower apical F-  
231 actin levels. The simulation results showed that such expected features in the vegetal  
232 half may progress to normal early gastrulation in the control embryos and partial  
233 exogastrulation in the inhibited embryos (Fig. 5). Therefore, appropriate embryonic  
234 intracellular apical F-actin distribution in the vegetal half is required for gastrulation.

235 One recent study suggested an outer intestinal embryo is formed by Rab35  
236 knockdown that might disturb the whole embryonic intracellular F-actin polarity  
237 (Remsburg et al., 2021). The results of the present study support this suggestion, and  
238 further indicate that the intracellular F-actin polarity on the vegetal pole side of the

239 embryo is particularly important for accurate gastrulation and the intracellular pH  
240 controlled by H<sup>+</sup>/K<sup>+</sup> ion pump is involved in this process.

241 Gastrulation does not proceed when apical lamina is inhibited (Burke et al., 1991).

242 The whole embryonic distributions of apical lamina along cells were nearly identical  
243 between the control and inhibited embryos, although large differences were observed  
244 between the cell shapes in the vegetal half and whole embryos. This indicated that the  
245 generated force was independent of the relative amounts of apical lamina in each cell.

246 Embryos with partial knockout of F-actin regulating factors (*RhoA* or *YAPI*) stopped the  
247 gastrulation at the primary invagination step (Fig. 4A, B). This indicated that the  
248 secondary invagination is inhibited without appropriately regulated F-actin, even if the  
249 apical lamina exists. Therefore, the apical lamina was suggested to be the scaffold for  
250 apical F-actin to generate the force required for the deformation processes driving the  
251 secondary invagination of gastrulation and whole embryonic deformation.

252 CRISPR-Cas9-mediated *RhoA* knockout showed intermediate level (55.6%) of  
253 mutation frequency (Fig. S3) and the knockout embryos exhibited the primary  
254 invagination. However, LV embryos expressing dominant negative RhoA failed to  
255 initiate primary invagination (Beane et al., 2006). Therefore, contribution of F-actin  
256 function is considerable for the primary invagination, but the extent of the dependency  
257 on F-actin function is less and a mechanism other than the F-actin-related system might  
258 be involved in this initial process. As mentioned above, F-actin function must be  
259 essential for the secondary invagination.

260 The F-actin network formation generating cell cortical forces was drastically

261 enhanced with decreased pH *in vitro* (Köhler et al., 2012) (25). The lower pH at the  
262 apical side compared with the basal side was maintained by H<sup>+</sup>/K<sup>+</sup> ion pump activity.  
263 Whole embryonic distributions of apical/basal ratios of pH indicator at step 2 correlated  
264 with those of intracellular actinin-GFP (Fig. 3D, F) suggesting that the F-actin  
265 concentration was high when the pH was low at the apical side of cells. Additionally,  
266 the apical/basal F-actin polarity in each cell significantly decreased in the vegetal half of  
267 the embryo by inhibiting H<sup>+</sup>/K<sup>+</sup> ion pump activity (Fig. 3E). Conversely, the whole  
268 embryonic distribution of intracellular pH and polarity was unchanged even when F-  
269 actin polymerization was directly perturbed by knockout of F-actin regulating factors  
270 (Fig. 4D). This suggested that the intracellular pH controlled by the H<sup>+</sup>/K<sup>+</sup> ion pump is a  
271 one-sided regulator of F-actin polymerization.

272 Inhibition of the H<sup>+</sup>/K<sup>+</sup> ion pump did not influence on the whole embryonic  
273 distribution of the apical lamina (Fig. 3G, H). This suggested that the regulation of F-  
274 actin intracellular distribution by pH is independent of the apical lamina. The embryo  
275 exhibited partial exogastrulation if the intracellular pH polarity at the primary  
276 invagination stage was weakened by inhibiting H<sup>+</sup>/K<sup>+</sup> ion pump activity. This indicated  
277 that H<sup>+</sup>/K<sup>+</sup> ion pump activity in the primary invagination stage provided a dominant  
278 contribution to the progress of the normal secondary invagination to form appropriate  
279 intracellular F-actin polarity in the whole embryo.

280 The influence of pH on F-actin network formation and force generation is a  
281 universal biochemical feature confirmed by *in vitro* experiments (Köhler et al., 2012).  
282 Inhibition of H<sup>+</sup>/K<sup>+</sup> ion pump activity significantly decreases intracellular pH in the LV

283 embryo (Schatzberg et al., 2015), while an increase in the intracellular pH was observed  
284 in the majority of cells in the HP embryo (Fig. S5). Decreases in the intracellular pH of  
285 LV may induce increases in the apical/basal polarities of intracellular pH and F-actin  
286 concentration like the “over-polarized embryo” model. The over-polarized embryo  
287 model exhibited a wider embryonic shape with a larger roundness index than the control  
288 embryos (Fig. 5B, S4B) which is consistent with LV imaging (Schatzberg et al., 2015).  
289 This supported the suggestion that  $H^+/K^+$  ion pump activity significantly contributed to  
290 early gastrulation through the regulation of intracellular F-actin apical/basal  
291 polarizations.

292 Omeprazole treatment of sea urchin embryos disrupts the left-right asymmetric  
293 formations of the adult rudiment although gastrulation is completed (Bessodes et al.,  
294 2012; Duboc et al., 2005; Hibino et al., 2006). The left-right asymmetric *nodal* gene  
295 expression observed immediately after gastrulation is important for establishing this  
296 asymmetry (Duboc et al., 2005). Frogs, chickens, zebrafish, and ascidians disrupt left-  
297 right asymmetry by inhibiting  $H^+/K^+$  ion pump activity (Kawakami et al., 2005; Levin  
298 et al., 2002; Shimeld and Levin, 2006). Disrupted left-right asymmetry in HP is  
299 observed at lower (~ 3/5 times) omeprazole concentrations (Hibino et al., 2006) than  
300 those in this study. Inhibition of  $H^+/K^+$  pump activity by dilute omeprazole solutions  
301 induced weak perturbation of gut formation in this study, which may disrupt cell-cell  
302 interactions and regulate whole embryonic *nodal* gene expression.

303 This report revealed the close relationship between pH, F-actin, and  $H^+/K^+$  ion  
304 pump activity inducing normal/abnormal gastrulation in sea urchins through

305 intracellular F-actin regulation. Embryonic F-actin distribution on the apical side of  
306 each cell was important for normal gastrulation, and H<sup>+</sup>/K<sup>+</sup> ion pump activity may be  
307 involved in F-actin distribution. This finding provides key insights into the evolutionary  
308 relationship between development and morphogenesis. Intracellular apical/basal  
309 polarity of pH showed different cellular features between vegetal and animal poles in  
310 step 2 of gastrulation. However, the formation of these position-dependent intracellular  
311 states was not explored. Therefore, upstream regulators of H<sup>+</sup>/K<sup>+</sup> ion pump activity  
312 should be investigated to reveal the detailed morphogenesis molecular mechanism. The  
313 universal effect of inhibiting H<sup>+</sup>/K<sup>+</sup> ion pump activity on early embryo formation among  
314 different animals will be tested in the future.

315

## 316 **MATERIALS AND METHODS**

### 317 **Animals and embryos**

318 Adult Japanese sea urchins (HP) were collected from Seto Inland Sea or Tateyama Bay.  
319 Eggs and sperm were obtained by coelomic injection of 0.55 M KCl. Fertilized eggs  
320 were cultured in filtered seawater at 16°C.

321

### 322 **Inhibition of H<sup>+</sup>/K<sup>+</sup> ion pump by omeprazole**

323 A 100 mM stock solution of omeprazole (FUJIFILM Wako Pure Chemical Corporation,  
324 Japan) dissolved in dimethyl sulfoxide (DMSO) was immediately added to fertilized  
325 eggs to a final concentration of 100 μM and cultured at 16°C.

326

327 ***In situ* nucleus and F-actin visualization in embryos**

328 Sea urchin embryos were fixed by immersion in fixative III (4% paraformaldehyde,  
329 32.5% filtered seawater, 32.5 mM 3-(N-morpholino)propane sulfonic acid (MOPS), pH  
330 7.0, 162.5 mM NaCl) for 16 h at 4°C. Embryos were washed three times using 0.5 mL 1  
331 x phosphate buffered saline (PBS), stored in 100% ethanol at -20°C, and used within 1  
332 week. Fixed embryos were washed three times with 1 x PBS, permeabilized with 0.5%  
333 Triton X-100 for 20 min at room temperature, washed three times with 1 x PBS, and  
334 stained with 100 nM phalloidin (in 1 x PBS) for 45 min at room temperature. Stained  
335 embryos were washed three times with 1 x PBS, mounted in SlowFade Gold antifade  
336 mountant with DAPI (Molecular Probes) and observed using a confocal laser scanning  
337 microscopy (Carl Zeiss LSM 700, Germany) with laser illumination at 405/435 nm  
338 excitation/emission for DAPI and 555/573 nm excitation/emission for phalloidin,  
339 respectively.

340

341 **Live imaging of pH, actinin, and apical lamina**

342 Intracellular pH of sea urchin embryos was visualized using pHrodo Red AM  
343 intracellular pH indicator or 5-(and-6)-carboxy SNARF-1 (C-1270) (ThermoFisher  
344 Scientific, USA) at final concentrations of 10 µM and 5 µM, respectively, and stained at  
345 16°C for 30 min. The embryos were washed in filtered seawater and observed using  
346 confocal microscopy with laser illumination at 555/585 nm excitation/emission for  
347 pHrodo and 555/573 m excitation/emission for SNARF-1, respectively.



348 Actinin and fibropellin-1 were visualized following fusion of the proteins with GFP.  
349 RNA was extracted from mesenchyme blastula stage HP embryos using ISOGEN  
350 (Nippongene, Japan) according to the manufacturer's instructions. Actinin and  
351 fibropellin-1 coding sequences were amplified by RT-PCR using SuperScript™ III  
352 Reverse Transcriptase (Thermo Fisher Scientific, USA) with the primers stated in Table  
353 S1 and cloned into pGreenLantern2-derived plasmid at restriction sites EcoRI and  
354 XhoI. mRNA (actinin-GFP, fibropellin-1-GFP, in that order) was synthesized *in vitro*  
355 using an mMMESSAGE mMACHINE T7 ultra transcription kit (ThermoFisher Scientific,  
356 USA) and purified using an RNeasy mini kit (Qiagen, Nederland). mRNA was  
357 microinjected into fertilized eggs as described by Liu et al., (2019).

358 Fluorescent images were acquired by confocal microscopy using an excitation of  
359 488 nm, and emission of 515 nm. The images of the animal and vegetal poles of the  
360 embryo were analyzed based on the *z*-stack image with the largest area by averaging  
361 seven *z*-axis images with a total thickness of 6  $\mu\text{m}$ .

362

### 363 **Quantification of experimental images**

364 The fluorescent images of embryos were acquired according to the angle  $\theta$  ( $0^\circ \sim 180^\circ$ )  
365 between the vegetal and animal poles along the circumference (Fig. S6) and  
366 transformed into a band-like image using the "Polar Transformer" function  
367 (<https://imagej.nih.gov/ij/plugins/polar-transformer.html>) of ImageJ 2.1.0. Each band-  
368 like image was filtered using a median filter (radius = 1.0). The filtered images were  
369 binarized using "Mean" (pHrodo indicator), "IsoData" (actinin), and "Triangle"

370 (fibropellin-1 and SNARF-1) functions, respectively, to obtain the cellular regions of  
371 the embryo. The apical/basal ratios of the pH indicator, actin-GFP, and fibropellin-1-  
372 GFP for  $\theta$  were determined using average fluorescent intensities over the regions with  
373 the width of 3.126  $\mu\text{m}$  from the apical and basal sides.

374 The fluorescent intensity of the pHrodo indicator was defined by the average  
375 fluorescent intensity over the intracellular region with a width of 6.232  $\mu\text{m}$  from the  
376 apical side (Fig. S6). Fluorescent values were estimated by taking the ratio between the  
377 observed fluorescence intensity and the average background fluorescence intensity  
378 around the entire embryo.

379 F-actin and apical lamina were stained by mRNA microinjections of actinin-GFP  
380 and fibropellin-1-GFP to fertilized eggs. Nonnegligible variations was inevitable in the  
381 concentration of injected mRNA among fertilized egg samples, which would be  
382 amplified during development. Therefore, only the apical/basal ratios were used to  
383 evaluate the intracellular features of F-actin and apical lamina distributions.

384 Two data points were obtained for each  $\theta$  from each fluorescence image of the  
385 embryo since the left and right sides of the embryo were considered axis symmetric  
386 against the animal-vegetal axis. Both data were used to estimate the sample average and  
387 95% confidence interval of each value, where the number of samples ( $n$ ) was given by 2  
388  $\times$  [number of observed embryos].

389

### 390 **Gene knockout by CRISPR-Cas9**

391 Knock out of endogenous *RhoA* and *YAPI* in HP was performed using the method

392 described by Liu et al., (2019). The oligonucleotide sequences used in sgRNA  
393 preparations were listed in Table S2.

394

### 395 **Heteroduplex mobility assay (HMA) and DNA sequencing analysis**

396 Analysis of knockout embryos by HMA and DNA sequencing was performed according  
397 to Liu et al., (2019). The primer sequences used to amplify each target region were  
398 listed in Table S3.

399

### 400 **Mathematical model of sea urchin embryos**

401 A 2-dimensional particles model describing cellular motion at the cross section of  
402 animal poles and vegetal poles of sea urchin embryos during steps 1 to 3 of gastrulation  
403 was constructed. The determined number of cells was based on that at the equatorial  
404 plane of the embryo at the blastula stage (Mizoguchi, 1999). The following assumptions  
405 were made: 1) each cell was represented by 16 particles with radii ( $r$ ) of  $1.125\ \mu\text{m}$ , and  
406 each embryo was represented by 64 cells connected in a ring (Fig. S7). 2) Each cell  
407 perimeter was  $36\ \mu\text{m}$  and the height and width of the embryo at step 1 was  $110\ \mu\text{m}$  and  
408  $100\ \mu\text{m}$ , respectively, which was consistent with sea urchin embryo observations  
409 (results not shown). 3) The number of cells was constant because cell divisions and  
410 cell invasions from other cross-sections were rarely observed during the primary  
411 invagination stage (Mizoguchi, 1999). 4) The motion of each particle obeyed the  
412 following overdamped limit of the equation of motion:

413 
$$\frac{\partial \mathbf{X}_{ij}}{\partial t} = -\frac{1}{\gamma} \frac{\partial V}{\partial \mathbf{X}_{ij}} \quad (1),$$

414 where  $\mathbf{X}_{ij} = (x_{i,j}(t), y_{i,j}(t))$  is the position of the  $j$ -th particle constructing the  $i$ -th  
 415 cell ( $i = 0, 1, 2, \dots, 63$  and  $j = 0, 1, 2, \dots, 15$ ) on the  $x$ - $y$  plane at time  $t$  (Fig. 5, Fig. S7),  $\gamma$  is the  
 416 coefficient of the drag force acting on each particle, and  $V$  is the potential of the entire  
 417 system. 5) The  $y$ -axis was parallel to the animal-vegetal axis of the embryo model. We  
 418 rewrote  $\frac{V}{\gamma} = U$  and  $U$  was calculated by:

419 
$$U = U_{bond} + U_{collision} + U_{actin} + U_{adhesion} + U_{ca} + U_{ea} \quad (2),$$

420 where  $U_{bond}$  is the elastic force potential between each neighboring pair of particles in  
 421 each cell to maintain each cell perimeter, denoted by:

422 
$$U_{bond} = \sum_{i=0}^{63} \sum_{j=0}^{15} \frac{k_b}{2} (d_{(i,j),(i,j+1)} - 2r)^2 \quad (3),$$

423 where  $k_b$ ,  $d_{(i,j),(i,j+1)}$ , and  $r$  are the coefficient of elasticity, the distance between the  $j$ -  
 424 th and  $j+1$ -th particle ( $j+1 = 0$  for  $j = 15$ ) in the  $i$ -th cell at time  $t$ , and the particle  
 425 radius, respectively.

426  $U_{collision}$  is the potential of excluded volume effects among all particles denoted as  
 427 follows:

428 
$$U_{collision} = \sum_{i < k} \sum_{j < l} \theta(2r - d_{(i,j),(k,l)}) \frac{k_c}{2} (2r - d_{(i,j),(k,l)})^2 \quad (4),$$

429 where  $k_c$  is the coefficient of repulsion between two particles, and  $\theta(x)$  is the  
 430 Heaviside step function.

431  $U_{actin}$  is the elastic force potential to form and sustain cell shape with the expansion  
 432 and contraction of the apical and basal sides by the cytoskeleton denoted as follows:

$$433 \quad U_{actin} = \sum_i \frac{k_a}{2} ((d_{(i,10),(i,14)} - l_i^a)^2 + (d_{(i,2),(i,6)} - l_i^b)^2) \quad (5),$$

434 where the apical and basal sides of the  $i$ -th cell consisted of particles with  $j = 10 - 14$   
 435 and  $j = 2 - 6$ , respectively. The wideness of the apical and basal sides at time  $t$  were  
 436 given by  $d_{(i,10),(i,14)}$  and  $d_{(i,2),(i,6)}$ , respectively. The basic wideness of the apical and  
 437 basal sides were given by  $l_i^a$  and  $l_i^b$ , respectively.  $k_a$  was assumed by the coefficient  
 438 of elasticity to sustain the wideness of the apical and basal sides of the cell.

439  $U_{adhesion}$  is the potential force for cell adhesion by proteins such as cadherin, and is  
 440 denoted as follows:

$$441 \quad U_{adhesion} = \sum_i \sum_j \frac{k_h}{2} (d_{(i,j),(i+1,k(j))} - 2r)^2 \quad (6),$$

442 where  $k_h$  is the coefficient for the adhesive forces between the particles of the  $i$ -th and  
 443  $i + 1$ -th cells ( $i + 1 = 0$  for  $i = 63$ ), and  $k(j) \equiv 6, 7, 8, 9, 10$  for  $j \equiv 2, 1, 0, 15, 14$ ,  
 444 respectively (Fig. S7).

445  $U_{ca}$  is the potential of the forces to conserve each cell area denoted as follows:

$$446 \quad U_{ca} = \sum_i \frac{k_{ca}}{2} (s_i - s_i^{ini})^2 \quad (7),$$

447 where  $k_{ca}$  is the coefficient of elasticity required to maintain each cell area. The area  
 448 of the  $i$ -th cell was estimated by  $s_i = \sum_{j=0}^{15} |\mathbf{X}_{i,j} - \mathbf{X}_i^{cc}|$  with  $\mathbf{X}_i^{cc} = \frac{1}{16} \sum_{j=0}^{15} \mathbf{X}_{i,j}$ , and  
 449  $s_i^{ini}$  referred to  $s_i$  given by  $\mathbf{X}_{i,j}$  at the initial state.

450  $U_{ea}$  is the potential of the forces to maintain the area (volume) of the sea urchin  
 451 embryo and denoted as follows:

$$452 \quad U_{ea} = \frac{k_{ea}}{2} (S - S^{ini})^2 \quad (8),$$

453 where  $k_{ea}$  is the coefficient of elasticity required to maintain embryo area. The area  
454 was estimated by  $S = \sum_{i=0}^{63} |\mathbf{X}_i^{cc} - \mathbf{X}^{ec}|$  with  $\mathbf{X}^{ec} = \frac{1}{64} \sum_{i=0}^{63} \mathbf{X}_i^{cc}$ , and  $S^{ini}$  referred to  
455  $S$  given by  $\mathbf{X}_{i,j}$  at the initial state.

456  $U_{ca}$  and  $U_{ea}$  were considered the alternatives of the volume-conserving forces in real  
457 3-D cells and embryos as internal pressures in each cell and embryo are considered  
458 isotropic.

459

#### 460 **Simulation method of mathematical model**

461 The simulations of the present mathematical model were performed through the  
462 integrals of equation of motion (1) using Euler method with time intervals of 0.000064  
463 h with conserved  $\mathbf{X}^{ec} = (0, 0)$ . In all models, the parameters  
464  $k_{bond}$ ,  $k_{collision}$ ,  $k_{actin}$ ,  $k_{adhesion}$ ,  $k_{ca}$ , and  $k_{ea}$  were given empirically as 9375, 6250,  
465 8125, 8125, 625, and 0.00625 hour<sup>-1</sup>, respectively, because there were no experiments to  
466 measure or estimate them. The qualitative features of the results were independent of  
467 the details of these values if the order was maintained. The model formed the embryo  
468 shape at step 1 of gastrulation if the appropriate cell type-dependent values of  $l_i^a$  and  
469  $l_i^b$ ,  $= l_i^{a,ini}$  and  $l_i^{b,ini}$  were given for the models of pigment cells, wedge cells, and  
470 other cells (Fig. 5). This configuration gave the particle positions  $\mathbf{X}_{i,j}$  at time  $t = 0$   
471 (initial configuration) in all simulations.

472 The early gastrulation processes were simulated by the change in  $l_i^a$  and  $l_i^b$   
473 respectively, from  $= l_i^{a,ini}$  and  $l_i^{b,ini}$  to  $= l_i^{a,fin}$  and  $l_i^{b,fin}$  at time  $t = 0$ . Here,  $l_i^{a,fin}$

474 and  $l_i^{b,fin}$  were assumed to obey  $l_i^{a,fin} + l_i^{b,fin} = l_i^{a,ini} + l_i^{b,ini} = \text{constant}$  among cells  
475 except pigment cells based on the expectation that F-actin was constant. The model  
476 showed similar structural behaviors to the early gastrulation as the relaxation process of  
477  $d_{(i,10),(i,14)} \rightarrow l_i^{a,fin}$  and  $d_{(i,2),(i,6)} \rightarrow l_i^{b,fin}$ .

478

### 479 **Statistical analysis**

480 All experiments were performed independently 2 times or more with 4 replicates or  
481 more per experiment. Statistical test was performed using SciPy library  
482 (<https://www.scipy.org/>). The roundness index of the vegetal side of each embryo was  
483 evaluated by: [embryo width half-way between the bottom and middle of the  
484 embryo]/[embryo length] (Fig. 5C).

485

486

### 487 **Acknowledgements**

488 We thank Prof. Masato Kiyomoto (Tateyama Marine Laboratory, Ochanomizu  
489 University) for supplying live sea urchins. We would like to thank Editage  
490 ([www.editage.com](http://www.editage.com)) for English language editing.

491

492

### 493 **Competing interests**

494 No competing interests declared.

495

496 **Author Contributions**

497 K.W., N.S., and A.A. conceived and designed the study; K.W., Y.K., and N.S. conducted  
498 the experiments; K.W., Y.Y., M.F., and A.A. analyzed the data; K.W. and A.A.  
499 conducted the mathematical model construction and simulations; K.W., N.S., and A.A.  
500 wrote the manuscript with support from all authors; T.Y. supervised the work.

501

502 **Funding information**

503 This work was supported by JSPS KAKENHI [grant, award number: 17K05614,  
504 21K06124 to A.A.]; and JSPS KAKENHI [grant, award number: 17K07241, 20K06602  
505 to N.S.]; JSPS KAKENHI [grant, award number: 19K20382 to M.F.]; SASAGAWA  
506 SCIENTIFIC RESERCH GRANT, [award number: 2021-4023, to K.W.]; Hiroshima  
507 University Graduate School Research Fellowship, 2021-2024 (InformationAI Field, to  
508 K.W.);

509

510 **References**

511 **Aihara M. and Amemiya, S. (2001).** Left-right positioning of the adult rudiment in sea  
512 urchin larvae is directed by the right side. *Development* **128**(24), 4935-4948.

513 doi:10.1242/dev.128.24.4935

514 **Beane, W. S., Gross, J. M. and McClay, D. R. (2006).** RhoA regulates initiation of  
515 invagination, but not convergent extension, during sea urchin gastrulation. *Dev.*

516 *Biol.* **292**(1), 213-225. doi:10.1016/j.ydbio.2005.12.031

517 **Bessodes, N., Haillot, E., Duboc, V., Röttinger, E., Lahaye, F. and Lepage, T.**



- 518 (2012). Reciprocal signaling between the ectoderm and a mesendodermal left-  
519 right organizer directs left-right determination in the sea urchin embryo. *PLoS*  
520 *Genet.* **8**(12), e1003121. doi:10.1371/journal.pgen.1003121
- 521 **Burke, R. D., Lail, M. and Nakajima, Y.** (1998). The apical lamina and its role in cell  
522 adhesion in sea urchin embryos. *Cell Adhesion Comm.* **5**(2), 97-108.  
523 doi:10.3109/15419069809040284
- 524 **Burke, R. D., Moller, D. J., Krupke, O. A. and Taylor, V. J.** (2014). Sea urchin  
525 neural development and the metazoan paradigm of neurogenesis. *Genesis* **52**(3),  
526 208-221. doi:10.1002/dvg.22750
- 527 **Burke, R. D., Myers, R. L., Sexton, T. L. and Jackson, C.** (1991). Cell movements  
528 during the initial phase of gastrulation in the sea urchin embryo. *Dev. Biol.*  
529 **146**(2), 542-557. doi:10.1016/0012-1606(91)90255-2
- 530 **Dan, K. and Okazaki, K.** (1956). Cytoembryological studies of sea urchins: III. Role  
531 of the secondary mesenchyme cells in the formation of the primitive gut in sea  
532 urchin larvae. *Biol. Bull.* **110**, 29-42.
- 533 **Davidson, E. H., Rast, J. P., Oliveri, P., Ransick, A., Calestani, C., Yuh, C. H.,**  
534 **Minokawa, T., Amore, G., Hinman, V., Arenas-Mena, C., Otim, O., Brown,**  
535 **C. T., Livi, C. B., Lee, P. Y., Revilla, R., Schilstra, M. J., Clarke, P. J., Rust,**  
536 **A. G., Pan, Z., Arnone, M. I., Rowen, L., Cameron, R. A., McClay, D. R.,**  
537 **Hood, L. and Bolouri, H.** (2002). A provisional regulatory gene network for  
538 specification of endomesoderm in the sea urchin embryo. *Dev. Biol.*, **246**(1), 162-  
539 190. doi: 10.1006/dbio.2002.0635

- 540 **Davidson, L. A., Koehl, M. A., Keller, R. and Oster, G. F.** (1995). How do sea  
541 urchins invaginate? Using biomechanics to distinguish between mechanisms of  
542 primary invagination. *Development* **121**(7), 2005-2018.  
543 doi:10.1242/dev.121.7.2005
- 544 **Duboc, V., Röttinger, E., Lapraz, F., Besnardeau, L. and Lepage, T.** (2005). Left-  
545 right asymmetry in the sea urchin embryo is regulated by nodal signaling on the  
546 right side. *Dev. Cell.* **9**(1), 147-158. doi:10.1016/j.devcel.2005.05.008
- 547 **Dupont, S., Morsut, L., Aragona, M., Enzo, E., Giulitti, S., Cordenonsi, M.,**  
548 **Zanconato, F., Le Digabel, J., Forcato, M., Bicciato, S. et al.** (2011). Role of  
549 YAP/TAZ in mechanotransduction. *Nature* **474**(7350), 179-183.  
550 doi:10.1038/nature10137
- 551 **Ettensohn, C. A.** (1984). Primary invagination of the vegetal plate during sea urchin  
552 gastrulation. *Amer. Zool.* **24**(3), 571-588. doi:10.1093/icb/24.3.571
- 553 **Gustafson, T. and Kinnander, H.** (1956). Microaquaria for time-lapse  
554 cinematographic studies of morphogenesis in swimming larvae and observations  
555 on sea urchin gastrulation. *Exp. Cell Res.* **11**(1), 36-51. doi:10.1016/0014-  
556 4827(56)90188-4
- 557 **Gustafson, T. and Kinnander, H.** (1960). Cellular mechanisms in morphogenesis of  
558 the sea urchin gastrula: The oral contact. *Exp. Cell Res.* **21**(2), 361-373.  
559 doi:10.1016/0014-4827(60)90268-8
- 560 **Hardin, J. D. and Cheng, L. Y.** (1986). The mechanisms and mechanics of  
561 archenteron elongation during sea urchin gastrulation. *Dev. Biol.* **115**(2), 490-

- 562           501. doi:10.1016/0012-1606(86)90269-1
- 563   **Hibino, T., Ishii, Y., Levin, M. and Nishino, A.** (2006). Ion flow regulates left-right  
564           asymmetry in sea urchin development. *Dev. Genes Evol.* **216**(5), 265-276.  
565           doi:10.1007/s00427-005-0051-6
- 566   **Hoshi, M.** (1979). Exogastrulation induced by heavy water in sea urchin larvae. *Cell*  
567           *Differ.* **8**(6), 431-5. doi:10.1016/0045-6039(79)90039-3
- 568   **Kawakami, Y., Raya, Á., Raya, R. M., Rodríguez-Esteban, C. and Izpisúa**  
569           **Belmonte, J. C.** (2005). Retinoic acid signalling links left-right asymmetric  
570           patterning and bilaterally symmetric somitogenesis in the zebrafish embryo.  
571           *Nature* **435**(7039), 165-171. doi:10.1038/nature03512
- 572   **Khurram, M., Hernandez, A., Eskalaei, M., Badali, O., Coyle-Thompson, C. and**  
573           **Oppenheimer, S. B.** (2004). Carbohydrate involvement in cellular interactions in  
574           sea urchin gastrulation. *Acta Histochem.* **106**(2), 97-106. doi:  
575           10.1016/j.acthis.2004.01.001
- 576   **Kimberly, E. L. and Hardin, J.** (1998). Bottle cells are required for the initiation of  
577           primary invagination in the sea urchin embryo. *Dev. Biol.* **204**(1), 235-50.  
578           doi:10.1006/dbio.1998.9075
- 579   **Köhler, S., Schmoller, K. M., Crevenna, A. H., Bausch, A. R.** (2012). Regulating  
580           contractility of the actomyosin cytoskeleton by pH. *Cell Rep.* **2**(3), 433-439.  
581           doi:10.1016/j.celrep.2012.08.014
- 582   **Kominami, T. and Takata, H.** (2004). Gastrulation in the sea urchin embryo: A model  
583           system for analyzing the morphogenesis of a monolayered epithelium. *Dev.*

- 584 *Growth Differ.* **46**(4), 309-326. doi:10.1111/j.1440-169x.2004.00755.x
- 585 **Levin, M., Thorlin, T., Robinson, K. R., Nogi, T. and Mercola, M.** (2002).  
586 Asymmetries in H<sup>+</sup>/K<sup>+</sup>-ATPase and cell membrane potentials comprise a very  
587 early step in left-right patterning. *Cell* **111**(1), 77-89. doi:10.1016/S0092-  
588 8674(02)00939-X
- 589 **Liu, D., Awazu, A., Sakuma, T., Yamamoto, T. and Sakamoto, N.** (2019).  
590 Establishment of knockout adult sea urchins by using a CRISPR-Cas9 system.  
591 *Dev. Growth Differ.* **61**(6), 378-388. doi:10.1111/dgd.12624
- 592 **Martik, M. L. and McClay, D. R.** (2017). New insights from a high-resolution look at  
593 gastrulation in the sea urchin, *Lytechinus variegatus*. *Mech. Dev.* **148**, 3-10.  
594 doi:10.1016/j.mod.2017.06.005
- 595 **McCain, E.R. and McClay, D.R.** (1994). The establishment of bilateral asymmetry in  
596 sea urchin embryos. *Development* **120**(2), 395-404. doi:10.1242/dev.120.2.395
- 597 **McClay, D. R., Miranda, E. and Feinberg, S. L.** (2018). Neurogenesis in the sea  
598 urchin embryo is initiated uniquely in three domains. *Development* **145**(21),  
599 dev167742. doi: 10.1242/dev.167742
- 600 **Mizoguchi, H.** (1999). Cell numbers in the gut of the embryo of the sea urchin  
601 *Hemicentrotus pulcherrimus*. *Zool. Sci.* **16**(2), 341-344. doi:10.2108/zsj.16.341
- 602 **Nakajima, Y. and Burke, R. D.** (1996). The initial phase of gastrulation in sea urchins  
603 is accompanied by the formation of bottle cells. *Dev. Biol.* **179**(2), 436-446.  
604 doi:10.1006/dbio.1996.0273
- 605 **Odell, G. M., Oster, G., Alberch, P. and Burnside, B.** (1981). The mechanical basis

- 606 of morphogenesis. I. Epithelial folding and invagination. *Dev. Biol.* **85**(2), 46-62.
- 607 doi:10.1016/0012-1606(81)90276-1
- 608 **Oliveri, P. and Davidson, E. H.** (2004). Gene regulatory network controlling
- 609 embryonic specification in the sea urchin. *Curr. Opin. Genet. Dev.*, **14**(4), 351–
- 610 360. doi: 10.1016/j.gde.2004.06.004
- 611 **Rensburg, C., Testa, M., Song, J. L.** (2021). Rab35 regulates skeletogenesis and
- 612 gastrulation by facilitating actin remodeling and vesicular trafficking. *Cells &*
- 613 *Dev.*, **165**(3), 203660. doi: 10.1016/j.cdev.2021.203660
- 614 **Schatzberg, D., Lawton, M., Hadyniak, S. E., Ross, E. J., Carney, T., Beane, W. S.,**
- 615 **Levin, M. and Bradham, C. A.** (2015). H<sup>+</sup>/K<sup>+</sup> ATPase activity is required for
- 616 biomineralization in sea urchin embryos. *Dev. Biol.* **406**(2), 259-270.
- 617 doi:10.1016/j.ydbio.2015.08.014
- 618 **Serrano Nájera, G. and Weijer, C. J.** (2020). Cellular processes driving gastrulation
- 619 in the avian embryo. *Mech. Dev.* **163**, 103624. doi:10.1016/j.mod.2020.103624
- 620 **Shimeld, S. M. and Levin, M.** (2006). Evidence for the regulation of left-right
- 621 asymmetry in *Ciona intestinalis* by ion flux. *Dev. Dyn.* **235**(6), 1543-1553.
- 622 doi:10.1002/dvdy.20792
- 623 **Shindo, A.** (2018). Models of convergent extension during morphogenesis. (2018).
- 624 *WIREs Dev. Biol.* **7**(1), e293. doi:10.1002/wdev.293
- 625 **Stower, M. J. and Bertocchini, F.** (2017). The evolution of amniote gastrulation: the
- 626 blastopore-primitive streak transition. *Wiley Interdiscip. Rev. Dev. Biol.* **6**(2),
- 627 e262. doi: 10.1002/wdev.262

- 628 **Takata, H. and Kominami, T.** (2004). Pigment cells trigger the onset of gastrulation in  
629 tropical sea urchin *Echinometra mathaei*. *Dev. Growth Differ.* **46**(1), 23-35.  
630 doi:10.1111/j.1440-169X.2004.00726.x
- 631 **Takemoto, A., Miyamoto, T., Simono, F., Kurogi, N., Shirae-Kurabayashi, M.,**  
632 **Awazu, A., Suzuki, K.-i. T. and Sakamoto, N.** (2016). Cilia play a role in  
633 breaking left-right symmetry of the sea urchin embryo. *Genes Cells* **21**(6), 568-  
634 578. doi:10.1111/gtc.12362
- 635 **Tamulonis, C., Postma, M., Marlow, H. Q., Magie, C. R., de Jong, J. and**  
636 **Kaandorp, J.** (2011). A cell-based model of *Nematostella vectensis* gastrulation  
637 including bottle cell formation, invagination and zippering. *Dev. Biol.* **351**(1),  
638 217-228. doi:10.1016/j.ydbio.2010.10.017
- 639 **Voiculescu, O., Bodenstein, L., Lau, I. J. and Stern, C. D.** (2014). Local cell  
640 interactions and self-amplifying individual cell ingression drive amniote  
641 gastrulation. *eLife* **3**, e01817. doi: 10.7554/eLife.01817
- 642 **Warner, J. F. and McClay, D. R.** (2014). Left-right asymmetry in the sea urchin.  
643 *Genesis* **52**(6), 481-487. doi:10.1002/dvg.22752
- 644 **Yaguchi, S., Yaguchi, J., Angerer, R. C., Angerer, L. M. and Burke, R. D.** (2010).  
645 TGF $\beta$  signaling positions the ciliary band and patterns neurons in the sea urchin  
646 embryo. *Dev. Biol.* **347**(1), 71-81. doi:10.1016/j.ydbio.2010.08.009  
647  
648  
649

650

651

652

653

654

655 **Figures**

656

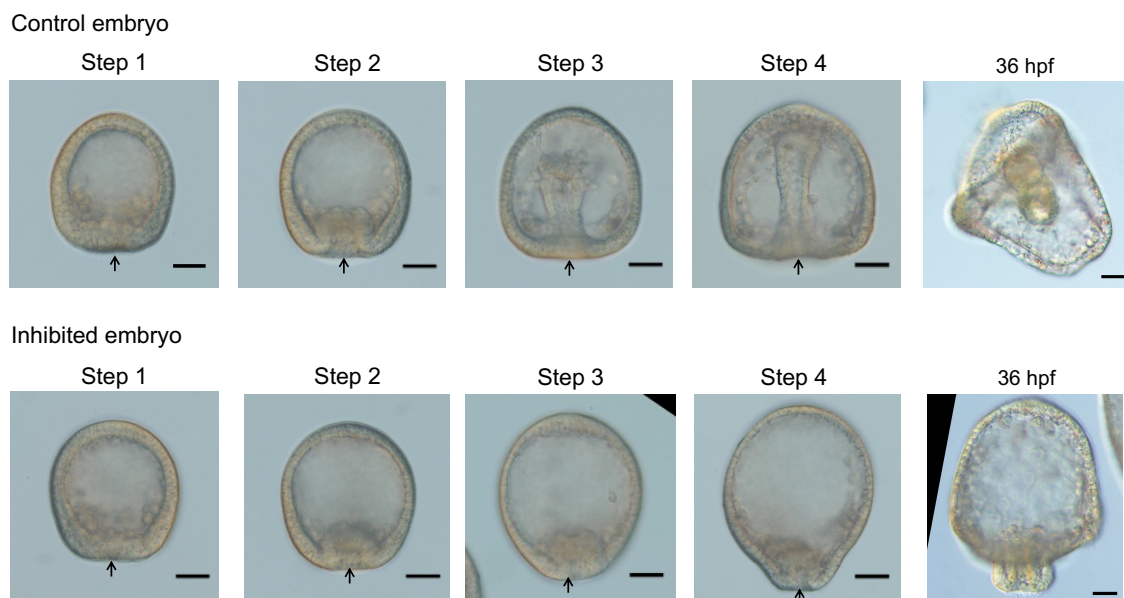

657

658 **Fig. 1. Developmental stages of control and  $H^+/K^+$  ion pump-inhibited HP**

659 **embryos.** Typical bright-field images of the gastrulation process (steps 1-4) and 36 hpf

660 embryos (scale bars: 30  $\mu$ m). Arrows indicate vegetal pole positions. Gastrulation did

661 not progress after step 2 in the inhibited embryos, and the outward protrusion of the

662 vegetal pole side was more pronounced at step 4. At 36 hpf, “partial” exogastrulation

663 was observed in the inhibited embryo.

664

665

666

667

668

669

670

671

672

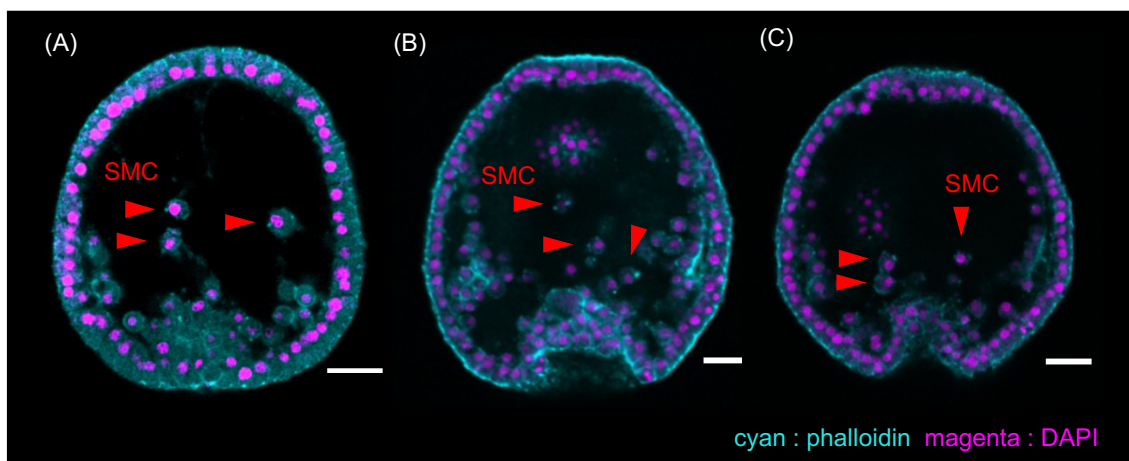

673

674 **Fig. 2. *In situ* SMC visualization of HP embryo development with inhibited H<sup>+</sup>/K<sup>+</sup>**

675 **ion pumps.** Confocal microscopy images at 24 hpf (A), 27 hpf (B), and 29 hpf (C)

676 (scale bars: 25 μm). The nucleus and F-actin in the embryos were stained with DAPI

677 (magenta) and phalloidin (cyan), respectively. SMC migration was confirmed at all

678 developmental stages as indicated by red triangles.

679

680

681



682

683

684

685

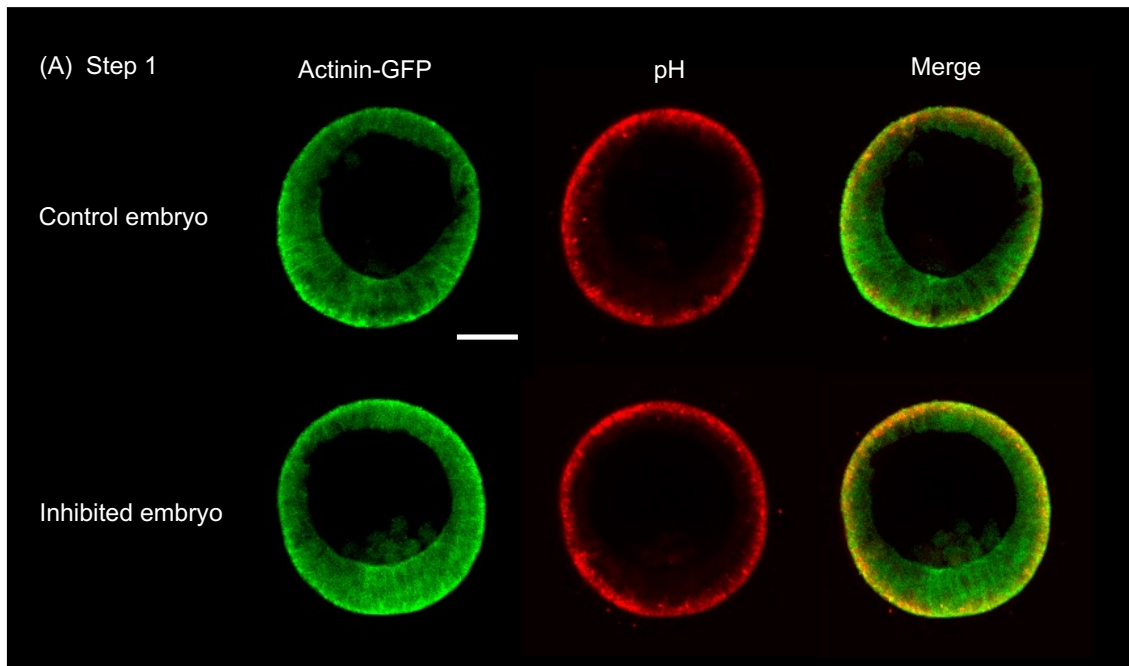

686

687

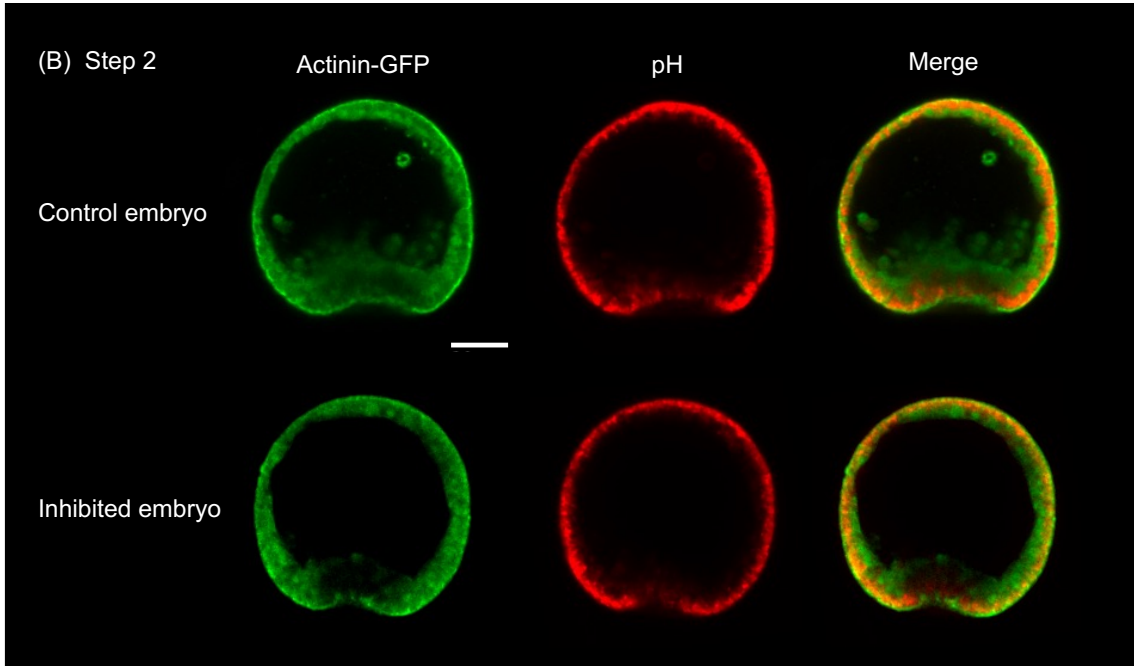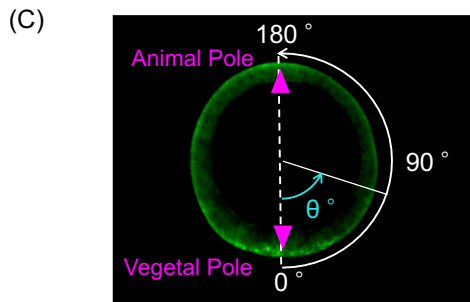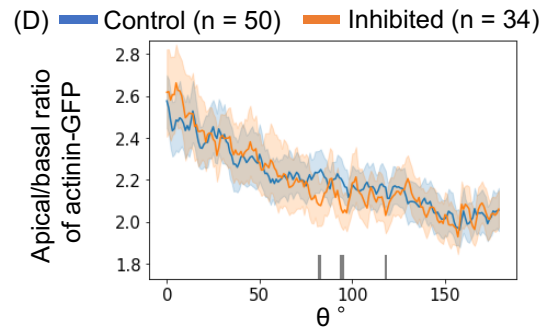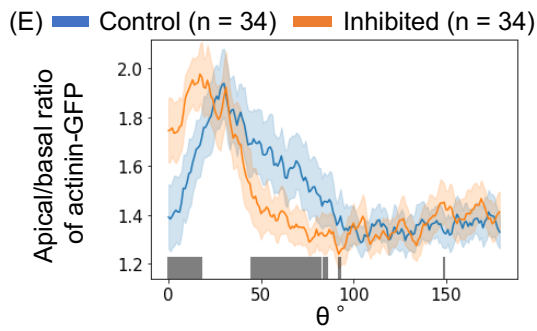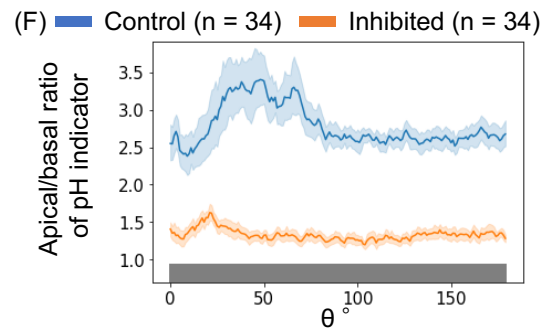

689

690

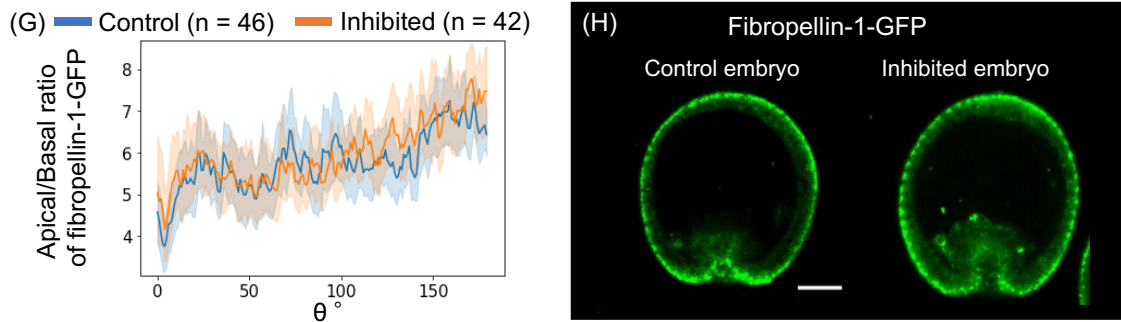

691

692 **Fig. 3. Whole embryonic distributions of pH, actinin-GFP, and fibropellin-1-GFP.**

693 (A-B) Confocal fluorescence microscopy images of co-stained intracellular pH (pH  
694 indicator: red) and actinin (actinin-GFP: green) at gastrulation step 1 (A) and step 2 (B)  
695 on the cross-section of animal poles and vegetal poles of control and inhibited embryos  
696 (scale bars: 30  $\mu\text{m}$ ). (C) Definition of angle  $\theta$  ( $0^\circ\sim 180^\circ$ ) from the vegetal pole ( $0^\circ$ ) to  
697 the animal pole ( $180^\circ$ ) along the circumference of the embryo cross-section. (D-F)  
698 Average apical/basal ratios and 95% confidence intervals (error bars) at angle  $\theta$  of  
699 actinin-GFP intensities at step 1 (D) and step 2 (E), pH indicator intensities at step 2 (F),  
700 and fibropellin-1-GFP intensities at step 2 (G). Blue and orange curves and bars  
701 represent the control and inhibited embryo values, respectively. Gray bars indicate  
702 significantly different average values between the control and inhibited embryos  
703 according to Welch's t-test ( $p < 0.05$ ) (see also Fig. S1.). The correlation coefficients of  
704 apical/basal ratios between actinin-GFP intensities (E) and pH indicator intensities (F)  
705 in control and inhibited embryos were 0.56 and 0.64, respectively. (H) Fluorescence  
706 images of fibropellin-1-GFP from control and inhibited embryos at gastrulation step 2  
707 (scale bars: 30  $\mu\text{m}$ ).

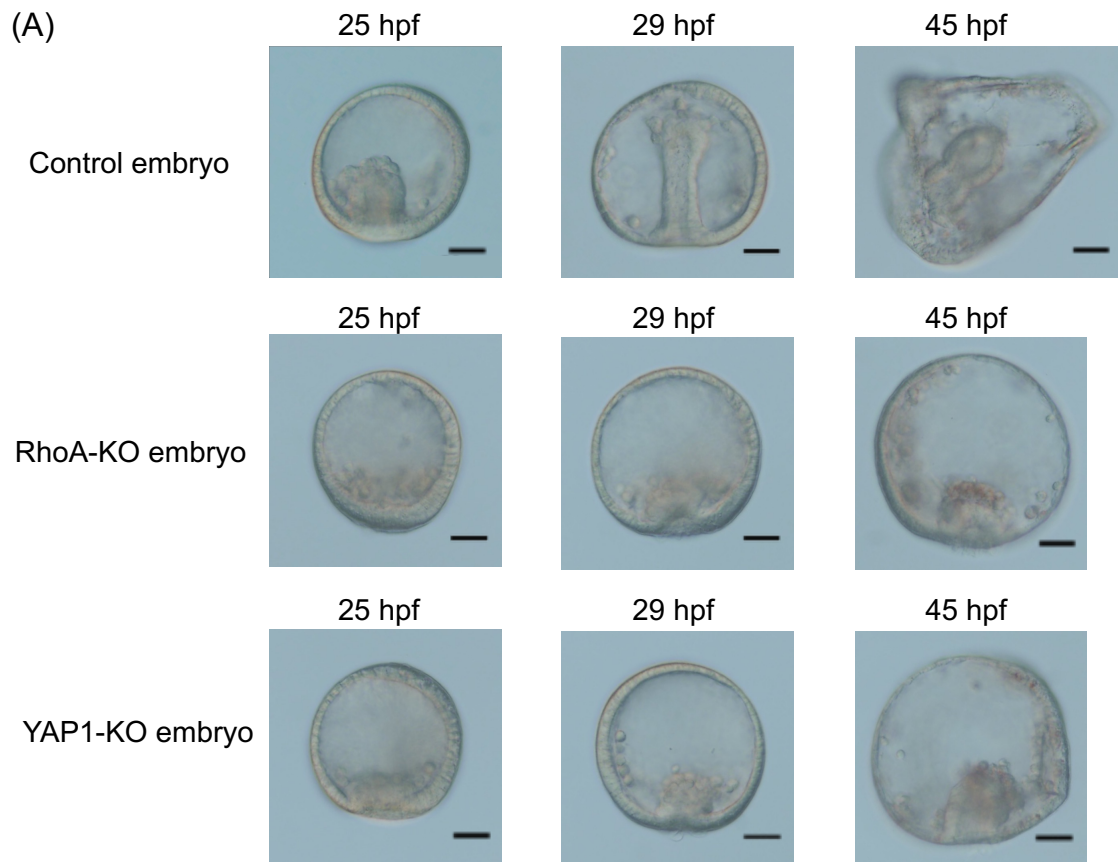

708

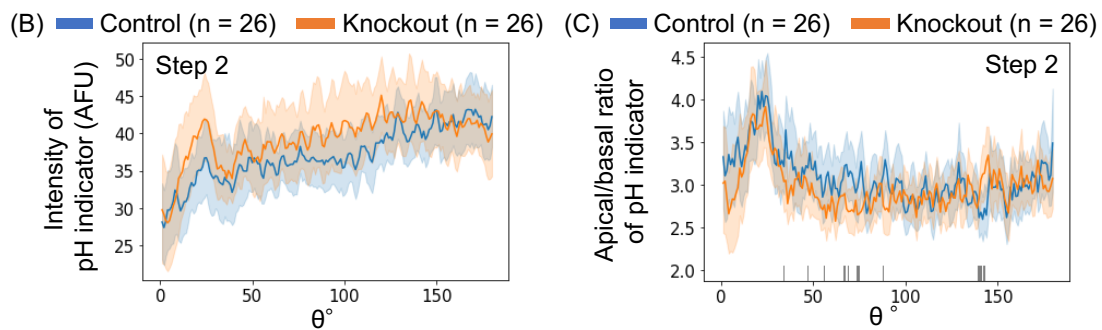

709

710 **Fig. 4. Effect of F-actin regulator knockout on gastrulation.**

711 (A) Bright-field images of gastrulation (steps 2-3) in control, *RhoA* knockout, and *YAP1*  
 712 knockout embryos at selected time-points. PMCs and pigment cells were observed in all  
 713 embryos suggesting that development did not stop. The knockout embryos did not form  
 714 the structure like prism larva observed at 45 hpf (step 3) in the control embryo (scale  
 715 bars: 30  $\mu$ m). (B-C) Average fluorescence intensities (arbitrary fluorescence units) and

716 95% confidence intervals (error bars) of intracellular pH indicator (B) and apical/basal  
717 ratio of pH indicator (C) of *RhoA* knockout embryos and control embryos as a function  
718 of angle  $\theta$ . The meanings of the colors and  $\theta$  are stated in Fig. 3 and Fig. S1.

719

720

721

722

723

724

725

726

727

728

729

730

731

732

733

734

735

736

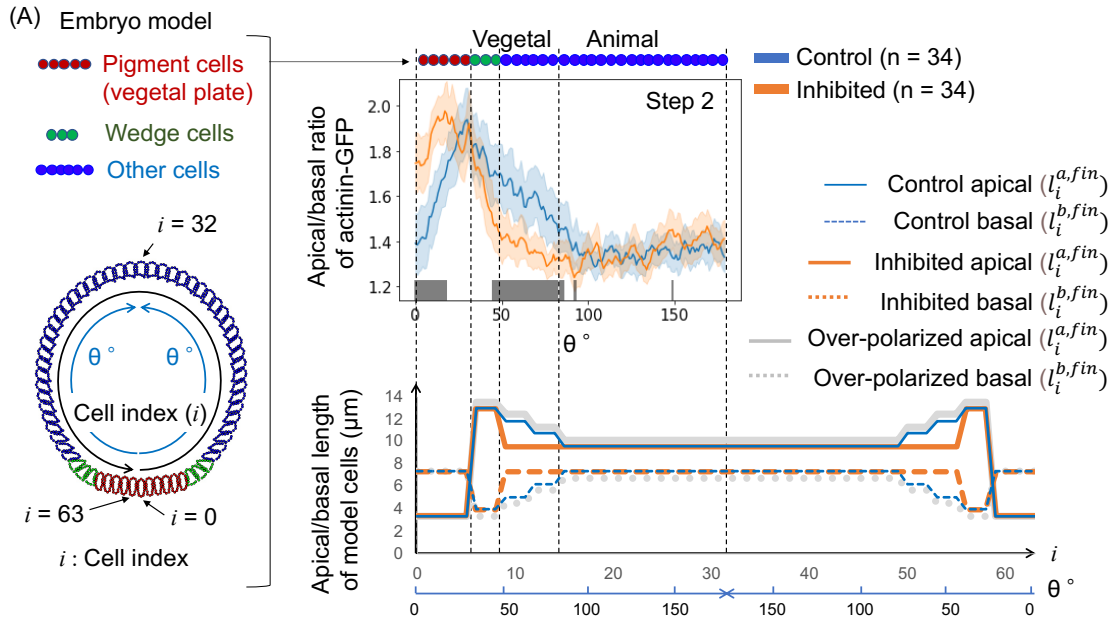

737

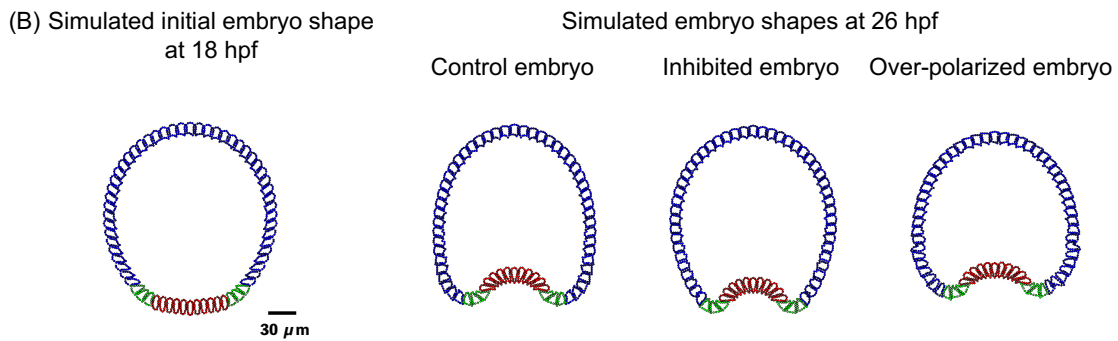

738

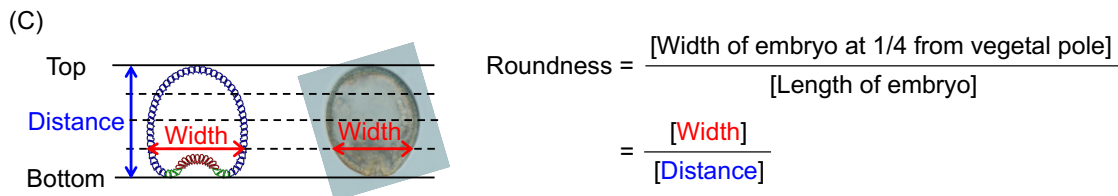

739

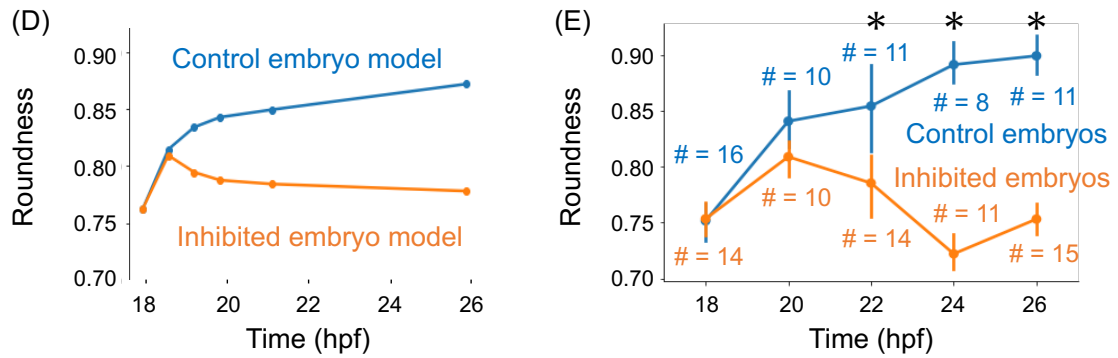

740

741 **Fig. 5. Coarse-grained model and simulation of control, inhibited, and over-**

742 **polarized embryos.** (A) Modeled cell lengths of apical and basal sides of control,  
743 inhibited, and over-polarized embryos;  $l_i^{a,fin}$  and  $l_i^{b,fin}$  refer to the final length of the  
744 apical and basal sides of the  $i$ -th cell, respectively (see Materials and methods).  
745 Distributions of the final length of the former two models was determined based on the  
746 distributions of apical/basal ratios of actinin-GFP intensities from control and inhibited  
747 embryos in step 2. The top center panel was a modification of Fig. 3D. Red, green, and  
748 blue circles in the top panel and panel (B) represent pigment cells, wedge cells, and  
749 other cells, respectively. (B) Snapshots of the initial embryo shape at 18 hpf and at 26  
750 hpf of the three models. (C) Definition of the roundness of the vegetal side of embryos  
751 from simulation results and imaging. (D-E) Roundness indices of vegetal sides of  
752 modeled control and inhibited embryos (D) and experimentally determined values (E).  
753 Blue and orange # refer to the number of control and inhibited embryos at each time  
754 point, error bars indicated 95% confidence intervals, and \* indicated that the roundness  
755 of control embryos was significantly larger than that of inhibited embryos according to  
756 Welch's t-test ( $p < 0.05$ , see Fig. S4B).
